# Supplementary material
Source: PubMed Central journal article supplement (PMC4286614)
Supplement: mmc2.pdf [file mmc2.pdf]

## Article

## Subdomain Interactions Foster the Design of Two Protein Pairs with ~80% Sequence Identity but Different Folds

Lauren L. Porter,<sup>1,2,\*</sup> Yanan He,<sup>1</sup> Yihong Chen,<sup>1</sup> John Orban,<sup>1,3</sup> and Philip N. Bryan<sup>1,2</sup><sup>1</sup>Institute for Bioscience and Biotechnology Research, University of Maryland, Rockville, Maryland; <sup>2</sup>Potomac Affinity Proteins, Rockville, Maryland; and <sup>3</sup>Department of Chemistry and Biochemistry, University of Maryland, College Park, Maryland

**ABSTRACT** Metamorphic proteins, including proteins with high levels of sequence identity but different folds, are exceptions to the long-standing rule-of-thumb that proteins with as little as 30% sequence identity adopt the same fold. Which topologies can be bridged by these highly identical sequences remains an open question. Here we bridge two 3- $\alpha$ -helix bundle proteins with two radically different folds. Using a straightforward approach, we engineered the sequences of one subdomain within maltose binding protein (MBP,  $\alpha/\beta/\alpha$ -sandwich) and another within outer surface protein A (OspA,  $\beta$ -sheet) to have high sequence identity (80 and 77%, respectively) with engineered variants of protein G ( $G_A$ , 3- $\alpha$ -helix bundle). Circular dichroism and nuclear magnetic resonance spectra of all engineered variants demonstrate that they maintain their native conformations despite substantial sequence modification. Furthermore, the MBP variant (80% identical to  $G_A$ ) remained active. Thermodynamic analysis of numerous  $G_A$  and MBP variants suggests that the key to our approach involved stabilizing the modified MBP and OspA subdomains via external interactions with neighboring substructures, indicating that subdomain interactions can stabilize alternative folds over a broad range of sequence variation. These findings suggest that it is possible to bridge one fold with many other topologies, which has implications for protein folding, evolution, and misfolding diseases.

### INTRODUCTION

Decades of empirical data suggest that similar amino acid sequences encode similar folds. A predictive rule of thumb has resulted from these observations: sequences with as little as 30% aligned sequence identity typically adopt the same fold (1). Consequently, a change in fold topology appears extremely unlikely unless the majority of a protein's residues are changed. This many-to-one relationship between sequence and structure tends to obscure the evolutionary pathway connecting one fold to another.

Recently, notable exceptions to this familiar relationship have been discovered, highly identical amino acid sequences that encode distinct folds. These exceptions have given new impetus to the hypothesis that novel protein folds can evolve via stepwise mutation (2). Over the last 10 years, seven natural and two engineered protein-fold switches have been identified (3–6). These shape-shifting polypeptides change conformation drastically in response to minor perturbations such as a single point mutation, a shift in pH, or addition of a metal. Additionally, a few earlier reports also demonstrated that proteins with >50% sequence identity can adopt different folds (7,8). In sum, these studies show that highly identical sequences can nevertheless bridge two different folds. One or several mutations to such a bridge sequence can result in a different fold.

We hypothesize that protein subdomains can be readily encoded by bridge sequences. Encompassed in a larger protein, these bridge sequences adopt a specific conformation through stabilizing contacts with neighboring subdomains. In isolation, i.e., absent these stabilizing interactions, bridge sequences adopt an alternative conformation.

Consistent with our hypothesis, six out of seven natural fold switches are protein subdomains that change conformations in response to an environmental change. These changes comprise a shift in pH (lymphotactin (9) and glycoprotein G (10)) or redox state (CLIC1 (11)), membrane release (P1 lysozyme (12)), or a change in binding mode (T7 RNA polymerase (13) and Mad2 (14)). Upon structural transformation, the fold-switching segment forms new stabilizing contacts with the structurally unchanged body of the protein, which functions as a supporting scaffold for both conformers. These interactions with neighboring subdomains play a central role in stabilizing both folds accessible to fold-switching segments of natural proteins. The seventh natural fold switch, the C-terminal domain of RfaH, also uses stabilizing external contacts to switch folds. It is a full protein domain that adopts an  $\alpha$ -helical fold when interacting with the N-terminal RfaH domain but a  $\beta$ -barrel fold in isolation (4).

From a physicochemical perspective, engineering sequences that bridge the fold of a domain with the fold of a topologically distinct subdomain is advantageous. The sequence encoding the domain can fold cooperatively in isolation, but the subdomain-encoding sequence does not

Submitted September 12, 2014, and accepted for publication October 30, 2014.

\*Correspondence: llporter@umd.edu

Editor: James Cole.

© 2015 by the Biophysical Society  
0006-3495/15/01/0154/9 \$2.00

<http://dx.doi.org/10.1016/j.bpj.2014.10.073>

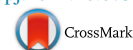

need to fold cooperatively. As a subdomain within a larger protein, this sequence relies on stabilizing interactions with neighboring substructures to assist cooperative folding into an accessible conformation that is not highly favored in isolation. This reasoning led to the successful engineering of an 11-residue peptide that switched conformations from an  $\alpha$ -helix to a  $\beta$ -sheet depending on its context within the IgG binding domain of protein G (15).

By engineering bridge sequences that encode protein subdomains, we circumvent a major barrier common to previous comparable efforts to engineer bridge sequences. These efforts targeted protein domains exclusively. Protein domains are cooperative folding units (16). Therefore, previously engineered bridge sequences needed not only high levels of sequence identity but also enough self-contained information to encode two distinct, cooperatively-folding conformations. In order to switch folds, the conformational ensembles of these shape-shifting proteins needed both a primary fold and a latent state that would dominate the ensemble through a change in environment such as metal binding, a single amino-acid change, or oligomerization. Our approach obviates the need for this latent state by stabilizing a noncooperative member of the unfolded state through external subdomain interactions.

Backed by observations in nature and physicochemical principles, we test our hypothesis by engineering subsequences that bridge two topologically distinct subdomains with an unrelated protein domain. Contextualized within their parent protein, these subsequences, up to 80% identical with the unrelated domain, maintained their original fold. Furthermore, we found that well-established physicochemical principles were sufficient to guide the engineering of these highly identical sequences.

In further detail, we engineered two variants of  $G_A$ , a 3- $\alpha$ -helix bundle protein, to have  $\geq 50\%$  sequence identity with subdomains of maltose binding protein (MBP,  $\alpha/\beta/\alpha$ -sandwich) and outer surface protein A (OspA,  $\beta$ -sheet). We solved the nuclear magnetic resonance (NMR) structure of a highly modified  $G_A$  variant and found that it maintains its original 3- $\alpha$ -helix bundle topology. Circular dichroism (CD) and NMR evidence suggests the same for the other  $G_A$  variants. In addition, we increased identity between the two fold pairs by changing amino acids within the corresponding MBP and OspA subdomains, raising sequence identity to 80 and 77%, respectively. The CD and NMR spectra of both modified proteins suggest that they adopt their original topologies. Furthermore, MBP remained active. These results support our hypothesis that interactions with neighboring subdomains play a central role in stabilizing alternative conformations accessible to a protein sequence.

## Nomenclature

To distinguish between the different variants, we use the following nomenclature:  ${}^{\%identity}_{variant}_{reference\ sequence}$ . All

reference sequences for both pairs are the highest identity versions unless otherwise noted. As an example,  ${}^{80}G_{A_{MBP}}$  is the  $G_A$  variant whose sequence is 80% identical to the highest identity subsequence in MBP, and  ${}^{80}MBP_{G_A}$  is the MBP variant whose subsequence is 80% identical to the highest identity  $G_A$  sequence. Similarly,  ${}^{77}G_{A_{OspA}}$  is the  $G_A$  sequence 77% identical to the highest identity OspA subsequence, and vice versa for  ${}^{77}OspA_{G_A}$ .

For the sake of brevity, we call  $G_A$  a “source fold” and the MBP and OspA subdomains “destination folds”.

## MATERIALS AND METHODS

### Fold pair selection

We aligned the sequence of PSD-1, a stable  $G_A$  variant (17), with every register of every nonredundant ( $\leq 90\%$  identical) protein sequence with an NMR structure or crystal structure of 2 Å or better (18). Structural similarity between PSD-1 and each sequence was quantified using the procedure detailed by Chellapa and Rose (19). Sequence diversity was determined using the CATH database (20). Proteins with sequences at least 15% identical to and structures distinct from  $G_A$  were investigated. We selected MBP and OspA because of their high stabilities, abundant expression levels, and straightforward purification protocols.  $G_A$  variant sequences replaced residues 12–67 in MBP and 24–79 in OspA.

### Protein design

Putative mutations were manually selected using the mutation wizard in the software PYMOL (21). We ignored resulting clashes that minor backbone adjustments could alleviate. We avoided grouping three or more hydrophobic residues in close contact on the protein surface. Physical principles informing anticipated destabilizing effects are detailed in Table S2 in the Supporting Material.

### Protein expression and purification

To facilitate their rapid purification,  $G_A$  MBP, and OspA variants were cloned into a PPAL8 vector, which encodes an N-terminally His-tagged subtilisin prosequence at the N-terminus of the fusion protein. Mutations were made through Q5 mutagenesis (New England BioLabs, Ipswich, MA) or quick change reactions with PfuTurbo (Agilent Technologies, Santa Clara, CA). Fusion protein variants were expressed in BL-DE3 cells by autoinduction. Cells were lysed by sonication in 100 mM phosphate buffer (pH 6.8, 1 mM EDTA, 5  $\mu$ M  $MgSO_4$ , 15  $\mu$ g DNaseI), one Complete Mini Protease pill (Roche, Basel, Switzerland), and fractionated by high-speed centrifugation (40,000  $g$  for 45'). Soluble extract of the prodomain fusion protein was loaded on a Profinity Exact column (Bio-Rad, Hercules, CA (22)) at 1 mL/min, washed with 2 M NaOAc (at pH 6.6) in 2 mL aliquots at 2 mL/min, and eluted with 7 mL of 100 mM  $KPO_4$  (pH 6.8, 1 mM EDTA and 10 mM  $NaNO_3$ ) at 0.2 mL/min. Buffer was exchanged at 2 mL/min to 100 mM  $KPO_4$  (at pH 6.8) with a 10-ml BioGel P-6 desalting cartridge (Bio-Rad). Before being loaded onto the subtilisin column, the  ${}^{50}G_{A_{OspA}}$  and  ${}^{57}G_{A_{OspA}}$  variants were loaded onto a Ni column in 100 mM phosphate and 10 mM imidazole (at pH 7.6), washed in 2-mL aliquots with the same buffer + 0.5 M NaCl, and eluted with 100 mM phosphate and 500 mM imidazole (at pH 8). Minimal medium (17) was used for  ${}^{15}N$  and  ${}^{13}C$  labeling. Labeled proteins were purified similarly, but on a 5-mL column and washed in 5-mL aliquots of NaOAc at 4 mL/min. All other rates and solutions were the same as for unlabeled proteins.

## CD

CD measurements were performed with a spectropolarimeter (model J-720; JASCO, Easton, MD) using quartz cells with path lengths of 1 mm on protein concentrations from 20 to 30  $\mu\text{M}$ . The ellipticity results were expressed as mean residue ellipticity,  $[\theta]$ , degrees per  $\text{cm}^2/\text{dmol}$  with extinction coefficients estimated by EXPASY (23). Temperature-induced unfolding was performed in the temperature range between 25 and 95°C in 1-cm jacketed cuvettes. Ellipticities at 222 nm were continuously monitored at a scanning rate of 1°/min. The following equation was used to determine fraction-native:

$$\frac{E - (m_U * T + b_U)}{(m_N * T + b_N) - (m_U * T + b_U)}$$

Here,  $E$  is the experimentally measured CD signal at a given temperature, and  $m_{U/N} * T + b_{U/N}$  values are the unfolded and native baselines, respectively, as a function of temperature ( $T$ ).

## NMR spectroscopy

NMR spectra were acquired on an Avance III 600 MHz spectrometer (Bruker, Billerica, MA) equipped with a  $z$ -gradient cryoprobe. A  $^{13}\text{C}$ -,  $^{15}\text{N}$ -labeled sample of  $^{79}\text{G}_{\text{MBP}}$  was prepared in 100 mM potassium phosphate buffer, pH 7.0, at a concentration of 0.27 mM. NMR assignments of backbone resonances were made utilizing the following three-dimensional experiments: HNCACB, CBCA(CO)NH, HNCO, and HNHA. All spectra were recorded at 10°C. Spectra were processed with the software NMRPIPE (24) and analyzed using the software SPARKY (25).

## Structure calculation and analysis

The backbone chemical shifts of  $^{80}\text{G}_{\text{MBP}}$  were used in combination with the software CS-ROSETTA (26) to determine a three-dimensional structure. From 1000 calculated ROSETTA models, the 10 lowest energy structures formed an ensemble with backbone root-mean square deviation of  $0.54 \pm 0.16 \text{ \AA}$  over the ordered region. Structures were analyzed with the softwares PROCHECK-NMR (27), PYMOL (21), and MOLMOL (28).

## RESULTS

### Fold pair selection

We selected a stable variant of  $\text{G}_A$  (PSD-1 (17); Fig. 1, both red and purple), as our source fold. It adopts a 3- $\alpha$ -helix bundle fold, one of the most common small protein topologies adopted by multiple highly-dissimilar sequences (29). We hypothesized that this broad sequence diversity indicates a high mutational tolerance. Four additional properties of PSD-1 commended it as a source fold: its stability (5.6 kcal/mol (30)), multiple previous NMR studies (30–32), ability to switch folds in other contexts (5,33), and its length (56 residues). This shorter length is advantageous because smaller proteins tend to be less stable and therefore more amenable to adopting alternative topologies; they also require fewer amino acid substitutions to increase sequence identity. As of this writing, the longest fold-switching chain is 66 residues (4), and most known fold-switching segments are  $\leq 50$  residues long (3,6). This

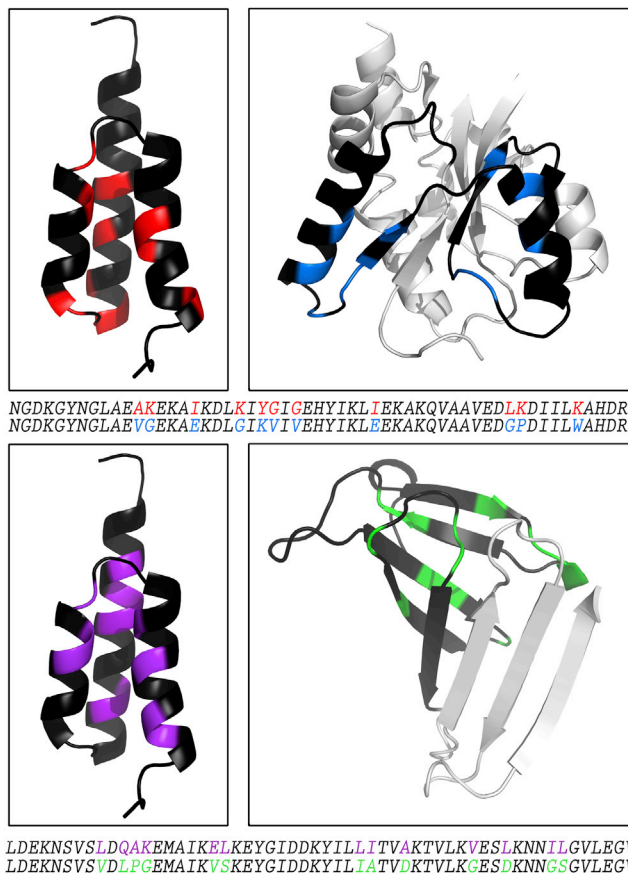

FIGURE 1 Engineered proteins with high levels of sequence identity but different folds. Out of 56 residues, 11 and 13 positions of nonidentity remain between the  $^{80}\text{G}_{\text{MBP}}$ - $^{80}\text{M}_{\text{BP}}\text{G}_A$  and  $^{77}\text{G}_{\text{OspA}}$ - $^{77}\text{OspA}_G$  fold pairs (top and bottom rows, respectively). (Black) Positions that are identical; colored positions denote remaining positions of nonidentity: (red)  $^{80}\text{G}_{\text{MBP}}$ ; (blue)  $^{80}\text{M}_{\text{BP}}\text{G}_A$ ; (purple)  $^{77}\text{G}_{\text{OspA}}$ ; and (green)  $^{77}\text{OspA}_G$ . Color-coding of the sequence alignments corresponds to the coloring of the structures above. (Gray) Segments of MBP and OspA that lie outside of their high-identity subdomains and maintain their wild-type sequences. This figure shows truncated versions of MBP (N-domain only) and OspA (residues 23–116), although both experimental constructs are complete (N- and C-domains for MBP and residues 17–273 for OspA). PDB IDs are as follows:  $\text{G}_A$ , 2FS1; MBP, 1N3X, chain A; OspA, 1OSP, chain O. To see this figure in color, go online.

does not preclude longer protein chains from switching folds, especially intrinsically disordered proteins, whose flexibility may foster multiconformational behavior even at longer lengths (34). Still, we expect shorter protein chains to switch folds more frequently than longer ones.

Using the procedure below we selected two destination folds with different topologies: MBP ( $\alpha/\beta/\alpha$ -sandwich) and OspA ( $\beta$ -sheet).  $\text{G}_A$ 's sequence was aligned with every register of every nonredundant protein sequence (90% identity threshold) with a high-quality structure (2  $\text{\AA}$  or better). Potential destination folds were screened for structural dissimilarity using the method described by Chellapa and Rose (19) and selected by the following criteria.



nuclear Overhauser effect-derived conformations for similar types of proteins (35). The CS-ROSETTA structure of  $^{79}\text{GA}_{\text{MBP}}$  displays a 3- $\alpha$  fold with  $\alpha$ -helices at residues 8–23, 28–35, and 39–52, while residues 1–7 and 53–56 are disordered (Fig. 2 B). Comparison with the fold topology of the parent  $\text{G}_A$  shows a backbone root-mean square deviation of 1.0 Å between the mean structures, indicating high overall similarity between the conformations of  $\text{G}_A$  and  $^{79}\text{GA}_{\text{MBP}}$ . Structure statistics are summarized in Table S3. The structure and NMR assignments have been deposited in the PDB and BMRB with accession codes 2MH8 and 19623, respectively.

CD and NMR studies of  $^{80}\text{GA}_{\text{MBP}}$  and  $^{77}\text{GA}_{\text{OspA}}$  indicate that they adopt the same 3- $\alpha$  helix bundle topology as  $^{79}\text{GA}_{\text{MBP}}$ . The CD spectra of  $^{80}\text{GA}_{\text{MBP}}$  and  $^{77}\text{GA}_{\text{OspA}}$  are nearly identical to that of  $^{79}\text{GA}_{\text{MBP}}$ , strongly suggesting a helical topology (see Fig. S1 a). Furthermore, thermal melting of  $^{80}\text{GA}_{\text{MBP}}$  and  $^{77}\text{GA}_{\text{OspA}}$ , monitoring the CD ellipticity at 222 nm, shows cooperative transitions ( $T_M$  values of 57 and 58°C, respectively) that are consistent with a stably folded protein (see Fig. S1 b). Moreover, the two-dimensional  $^{15}\text{N}$  HSQC spectra of both  $^{80}\text{GA}_{\text{MBP}}$  and  $^{77}\text{GA}_{\text{OspA}}$  have well-dispersed main-chain amide signals, providing further evidence of stable structure (see Fig. S2).

The CD and NMR spectra of both  $^{80}\text{MBP}_{\text{GA}}$  and  $^{77}\text{GA}_{\text{OspA}}$  suggest that they are folded in their parent conformations. The CD spectra of the two variants are consistent with their parent folds (see Fig. S3, a and b). Furthermore, the NMR spectra of both  $^{80}\text{MBP}_{\text{GA}}$  and  $^{77}\text{OspA}_{\text{GA}}$  overlay well with the spectra of their parent proteins, suggesting that the engineered subsequences induced neither local nor global unfolding (Fig. 3, A and C). The variations in cross-peak positions are expected because the sequences of both  $^{80}\text{MBP}_{\text{GA}}$  and  $^{77}\text{OspA}_{\text{GA}}$  differ from their wild-type counterparts by 11 amino acids.

Furthermore,  $^{80}\text{MBP}_{\text{GA}}$  remains active. Addition of  $\beta$ -cyclodextrin shifts the peaks of  $^{80}\text{MBP}_{\text{GA}}$ 's two-dimensional  $^{15}\text{N}$  HSQC spectrum to locations like those of wild-type MBP under the same conditions (Fig. 3 A (36)). Accordingly, there is significant peak overlap between the two spectra, and the overall pattern of backbone amide shifts is very similar. These data therefore suggest that  $^{80}\text{MBP}_{\text{GA}}$  maintains the same general fold topology as its parent, wild-type MBP. In particular, the binding of  $\beta$ -cyclodextrin to  $^{80}\text{MBP}_{\text{GA}}$  strongly suggests that the  $\alpha/\beta/\alpha$ -sandwich topology of  $^{80}\text{MBP}_{\text{GA}}$ 's N-domain is preserved because this domain comprises part of the binding epitope in wild-type MBP (Fig. 3 B).

### Thermostability analysis of $\text{G}_A$ and MBP variants

After confirming that our high-identity  $\text{G}_A$ -MBP and  $\text{G}_A$ -OspA pairs adopted their parent conformations, we measured the thermostabilities of the  $\text{G}_A$ -MBP variants and compared them to the anticipated destabilizing effects

for each mutational set (Fig. 4). We found that changes in  $\text{G}_A$ 's thermostabilities were generally well correlated with its anticipated mutational effects: minor mutations affected its  $T_M$  value negligibly, while significant mutations affected its  $T_M$  value the most substantially. This demonstrates that our method for classifying the destabilizing effects of mutations on  $\text{G}_A$  was accurate. Because these classifications were based on experiments performed largely on small independently-folding protein domains, the consistency between predictions and experiments is expected. In contrast, little correlation was found between MBP's changes in thermostability and the anticipated effects of its mutations. This demonstrates that these classifications were an inadequate predictor of mutational effects on MBP. Note, however, that small changes in  $T_M$  values correspond to larger changes in  $\Delta G$  for larger proteins, so the 2° decreases in MBP's  $T_M$  values are significant. We did not perform a similar analysis on the  $\text{G}_A$ -OspA pair because no significant correlation would arise from the analysis: only four and three variants of each protein were produced, respectively.

The inconsistency between  $^{80}\text{MBP}_{\text{GA}}$ 's experimentally determined  $T_M$  values and its anticipated mutational effects suggested that interactions with neighboring substructures may be affecting its  $T_M$  values. To test this hypothesis, we calculated the  $\Delta\Delta G$  values of all  $\text{G}_A$  and MBP variants from their  $T_M$  values. We then compared these experimentally derived values with predicted  $\Delta\Delta G$  values from POPMUSIC 2.1 (37), a web server that predicts the effects of point mutations on protein stability using statistical potentials.

Two conditions suggest that stabilizing interactions with neighboring subdomains are present.

1. The experimentally derived  $\Delta\Delta G$  values of the MBP variant must be significantly less than the predicted  $\Delta\Delta G$  values. This indicates that the mutation was significantly less destabilizing than expected.
2. Experimentally derived and predicted  $\Delta\Delta G$  values should be consistent for all  $\text{G}_A$  variants. This demonstrates that the predictions are generally good and, therefore, the inaccurate prediction of MBP's  $\Delta\Delta G$  values does not arise from a systematic error in the prediction algorithm.

Comparison of experimentally derived and predicted  $\Delta\Delta G$  values for  $\text{G}_A$  and MBP suggests that that interactions with neighboring substructures are likely to stabilize the native conformation of MBP's engineered subdomain (see Table S4 and Fig. S4). Experimentally derived and predicted  $\Delta\Delta G$  values were positively correlated for  $\text{G}_A$  ( $R^2 = 0.94$ , see Fig. S4), while MBP's experimentally derived  $\Delta\Delta G$  values were negatively correlated.

The negative correlation between experimentally derived and predicted  $\Delta\Delta G$  values for MBP demonstrates that its predicted  $\Delta\Delta G$  values are inconsistent with experiment. Specifically, the webserver predicted that four mutations

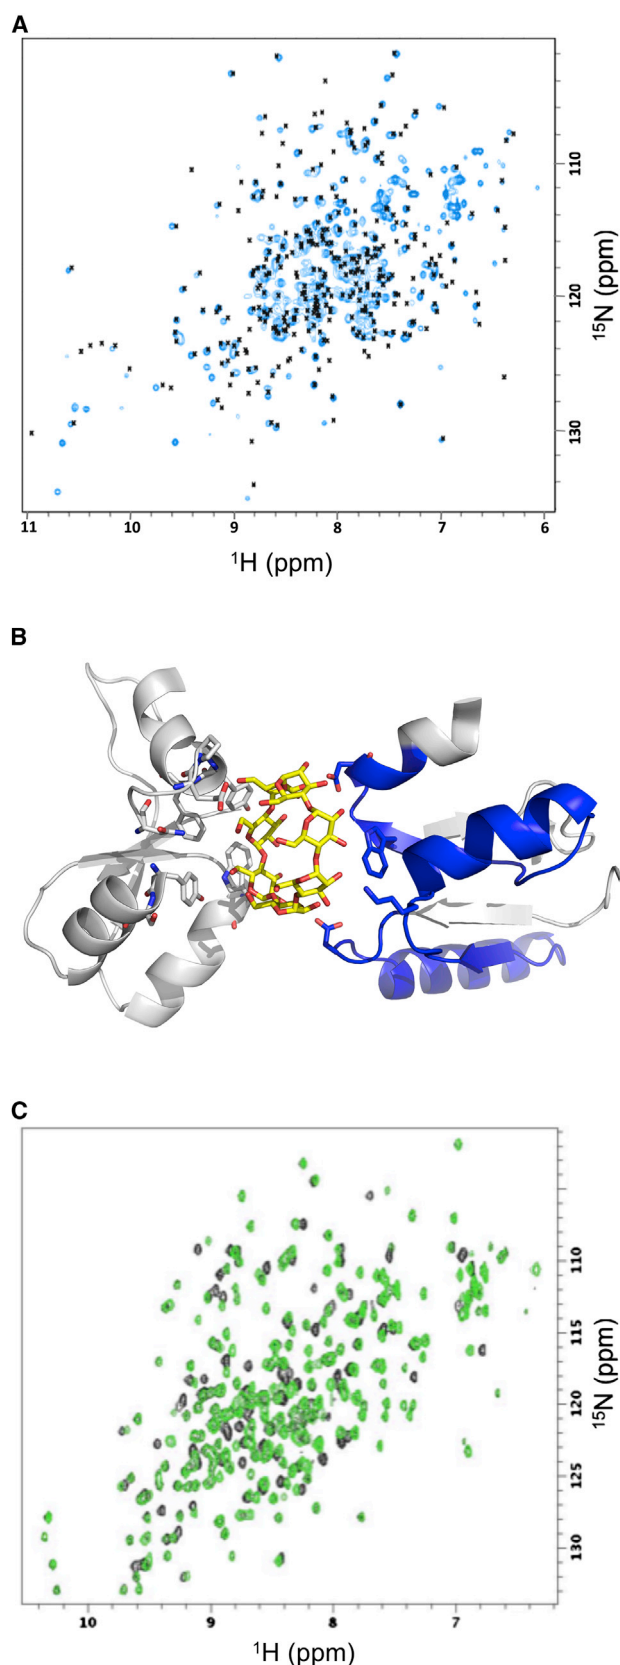

FIGURE 3 Both  $^{80}\text{MBP}_{\text{GA}}$  and  $^{77}\text{OspA}_{\text{GA}}$  fold similarly to their corresponding wild-type forms. (A) The two-dimensional  $^{15}\text{N}$  HSQC spectrum of  $^{80}\text{G}_{\text{A}}\text{MBP}$  (blue) is overlaid with positions of assigned backbone

would strongly destabilize its structure, but they were not nearly as destabilizing as expected (see Table S4). The most striking of these is the combined F27A and T31L mutation (Fig. 4 and see Table S4), which is predicted to destabilize MBP by 3.65 kcal/mol but, in fact, has no destabilizing effect. This discrepancy is surprising because F27 is a highly-conserved residue whose mutation to alanine is predicted to destabilize MBP by 3.43 kcal/mol because it is buried in the core of MBP with no solvent-accessible surface area.

Several factors are likely to contribute to this inconsistency.

1. MBP's backbone may have rearranged to allow stronger interactions between F27's former hydrophobic contacts. These rearrangements could also foster new stabilizing interactions between nearby residues and the modified hydrophobic cluster.
2. L31 could form compensatory hydrophobic contacts with the residues formerly interacting with F27. Inspection of the structure suggests, however, that this could only occur upon significant backbone rearrangement. In light of these two explanations, experiments are underway to determine the structure of this MBP variant and identify possible rearrangements.
3. F27 could be buried in both the folded and unfolded states. If so, it would contribute no additional stabilizing free energy to MBP upon folding because it is buried in both states.

Regardless of the reason, however, all three of these explanations are likely to involve stabilizing interactions with neighboring substructures because four out of five residues interacting with residue 27 are >200 residues C-terminal to it. Regarding the mutations that did destabilize MBP significantly, we note that MBP's free energy of unfolding is  $\sim 10.2$  kcal/mol (38). This high initial stability allows it to remain folded after more destabilizing mutations than a smaller protein, such as  $\text{G}_{\text{A}}$ , could withstand.

The strong positive correlation ( $R^2 = 0.94$ ) between predicted and experimentally derived  $\Delta\Delta G$  values for all  $\text{G}_{\text{A}}$  variants demonstrates that the discrepancies between experimentally derived and predicted  $\Delta\Delta G$  values in MBP are

---

resonances from the wild-type MBP spectrum (black). The  $^{80}\text{MBP}_{\text{GA}}$  spectrum was recorded using similar conditions to those employed for the wild-type MBP (37°C, 20 mM sodium phosphate, pH 7.2, 3 mM sodium azide, 0.1 mg/mL Pefabloc, 2 mol equivalents of  $\beta$ -cyclodextrin). (B) MBP's binding site complexed with  $\beta$ -cyclodextrin. (Sticks)  $\beta$ -cyclodextrin (yellow) and active-site residues in both the N- and C-domains. MBP's modified subdomain (blue) contains four of the 14 active-site residues; all residues outside of this subdomain (gray) maintain their wild-type sequences. Only structures near the binding site are shown. PDB 1DMB. (C) The two-dimensional  $^{15}\text{N}$  HSQC spectrum of  $^{77}\text{OspA}_{\text{GA}}$  (green) is consistent with that of wild-type (black). Both were acquired at 10°C in 100 mM of potassium phosphate buffer, pH 7.0. To see this figure in color, go online.

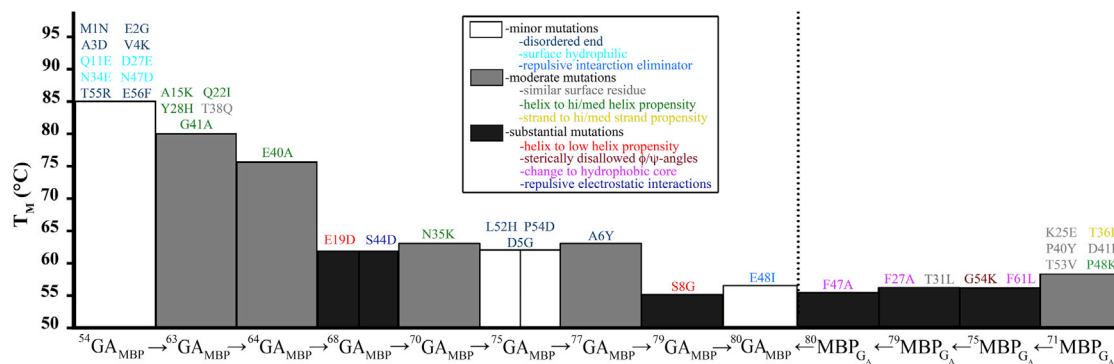

FIGURE 4 Thermostabilities of  $G_A$  and MBP variants. Mutational series for  $G_A$  and MBP begin on opposite sides of the figure (left and right, respectively; dotted line separation indicates that  $T_M$  values on opposite sides cannot be compared meaningfully).  $T_M$  values are color-coded by anticipated mutational effects on structure: minor (white), moderate (gray), and substantial (dark gray). The F27A T31L mutation is shown (dark gray) because the anticipated destabilization from the F27A mutation was expected to be significant. Mutations from parent proteins are listed above the  $T_M$  values of each variant and are color-coded by their structural classification: disordered end (dark blue), surface hydrophilic (light blue), repulsive interaction eliminator (blue), similar noninteracting surface residue (gray), helix to residue with high/medium helix propensity (green), helix to residue with low helix propensity (dark orange-red), sterically disallowed  $\phi/\psi$  angles (brown), change to hydrophobic core (magenta), and repulsive electrostatic interaction (purple).  $^{68}G_{A_{MBP}}$  and  $^{75}G_{A_{MBP}}$  are divided in half to show that two independent sets of mutations were made (see Table S1, A and B). Identity levels for both  $G_A$  and MBP are with respect to the highest-identity partner. The initial level of identity between  $G_A$  and MBP was 16%. To see this figure in color, go online.

likely to be significant. POPMUSIC 2.1 predicted three substantially destabilizing mutations to  $G_A$ , all of which correspond to the largest changes in its  $T_M$ : 7–8°C each (Fig. 4 and see Table S4). All three mutations destabilize the structure of  $G_A$ 's helices, but none of them are located within its hydrophobic core, nor are they glycine, which destabilizes helical structure more significantly. Furthermore, the effects of less-destabilizing mutations also correspond well with experimentally derived values.

Therefore, we conclude that the web server POPMUSIC failed to predict the  $\Delta\Delta G$  values for MBP accurately because the effects of our mutations were outside of the scope of its predictive power. We hypothesize that MBP's conformation rearranged to optimize contacts with neighboring subdomains. Similar rearrangements would have had little effect on a small, independently-folding protein like  $G_A$  because no similar contacts with neighboring substructures are available to stabilize it.

## DISCUSSION

We designed and produced two protein pairs with 80 and 77% sequence identity but different folds. One member of each fold pair was a protein subdomain stabilized by interactions with structural neighbors, and the other was an independently folding protein domain. Our design procedure was straightforward, involving manual designs based on well-established physicochemical principles. The key to our approach was using interactions with neighboring subdomains to stabilize the conformations of the protein subdomains with high levels of aligned sequence identity to  $G_A$  (39). These interactions compensated for destabilizing effects of identity-increasing mutations to the subdomain.

In addition to stabilizing interactions from neighboring subdomains, two other factors bolstered our approach.

1. Our selection criteria identified good candidates for design. All selected structures were stable, common, and highly sequence-diverse. The role of stability is clear: more robust proteins are more likely to withstand destabilizing mutations and maintain their folds. While less obvious, it is equally important for the folds to occur frequently in nature and be encoded by diverse sequences, some of whose pairwise-aligned identities fall below the 25% threshold for possible homology. The importance is this: the protein backbone favorably adopts these folds, obviating the need for extensive sequence information to specify them (40).
2. The second factor that aided our success was that there are more protein subdomains than domains. This larger pool of design candidates availed a more diverse population of sequences and structures than the comparatively limited set of independently stabilized domains.

Combining this work with an earlier study (5), we observe that  $G_A$  variants can maintain their native 3- $\alpha$ -helix bundle topologies even after being engineered to extremely high sequence identity with several different folds. This is consistent with the network model of fold space (41). Applying this model, the 3- $\alpha$ -helix bundle is a hub fold connected to the alternative folds with which it has high sequence identity:  $\alpha/\beta$ -grasp,  $\alpha/\beta/\alpha$ -sandwich, and  $\beta$ -sheet. Considering the topological diversity of these three folds, the 3- $\alpha$ -helix bundle is likely connected to other folds as well.

Are folds other than the 3- $\alpha$ -helix bundle equally amenable to bridging other topologies? One might argue that  $G_A$ 's disordered terminal residues boost identity levels

artificially because they have been mutated to several disparate sequences without significantly destabilizing the 3- $\alpha$ -helix bundle topology. Excluding them decreases overall identity only slightly, however, from 77–80 to 73–76%. These modified levels still exceed the 44% cutoff for inferring structural similarity between 45-residue protein chains (1), suggesting that other protein structures may also be hubs in fold space.

Further characterization of bridge sequences encoding protein subdomains promises insight into several other areas of study.

1. It relates to protein misfolding diseases, which are associated with oligomerization of a particular protein subdomain, such as the amyloid-forming N-terminal segment of model protein Sup35 (42). Much like the protein substructures studied here, this subdomain changes conformation upon oligomerization, which provides intermolecular interactions that stabilize its disease-associated  $\beta$ -sheet structure. Proteins that shift conformations upon forming domain-swapped multimers behave similarly (43).
2. Genes encoding large proteins could be spliced to express their fold-switching subdomains separately, allowing them to fold and function in isolation. Results from a 2008 genomic study are consistent with this idea. They suggest that alternatively spliced protein isoforms can adopt different folds (44).
3. Additional study of bridge sequences will provide further insight into the role of epistatic mutations on protein evolution. A number of studies have shown that evolutionarily-conserved mutations outside of a protein's active site can impact its function significantly (45). For example, changing a steroid receptor's specificity from aldosterone to cortisol required two mutations, one of which had no apparent functional effect in isolation (46).

Similarly, the work we have presented focuses exclusively on changing residues within subdomains whose amino acid sequences are highly identical to  $G_A$ 's sequence. Our design principles suggest that further identity-increasing mutations within the binary sequence spaces of the  $G_A$ -MBP and  $G_A$ -OspA fold pairs are likely to cause unfolding. Mutations outside of this binary sequence space along with residue changes outside of the MBP and OspA subdomains are probably required to engineer full protein switches—protein sequences that adopt one conformation in isolation and another when encompassed in a larger protein. We are currently designing experiments to investigate this possibility.

## CONCLUSIONS

For this study, we designed two 3- $\alpha$ -helix bundle proteins with ~80% sequence identity to two radically different folds:  $\alpha/\beta/\alpha$ -sandwich and  $\beta$ -sheet. NMR and CD evidence

confirms that all four designed proteins maintain their parent folds. The  $\alpha/\beta/\alpha$ -sandwich and  $\beta$ -sheet folds were both subdomains within larger proteins. Using interactions with neighboring substructures to stabilize the folds of these subdomains was the key to our approach: these interactions eliminated the need for the  $\alpha/\beta/\alpha$ -sandwich and  $\beta$ -sheet to fold cooperatively in isolation. Thermodynamic measurements suggest that interactions with neighboring substructures may have also decreased the destabilizing effects of mutations to the subdomains. Given that 3- $\alpha$ -helix bundle variants have high levels of sequence identity with multiple different folds, it is possible for one protein fold to evolve into several—and possibly many—distinct conformations through stepwise mutation.

## SUPPORTING MATERIAL

Four figures and three tables are available at [http://www.biophysj.org/biophysj/supplemental/S0006-3495\(14\)03066-5](http://www.biophysj.org/biophysj/supplemental/S0006-3495(14)03066-5).

## ACKNOWLEDGMENTS

We thank Biao Ruan, Kathryn Fisher, Eun Jung Choi, and Dana Motabar for helpful experimental suggestions and scientific input, and George Rose, Aaron Robinson, Mike Harms, Rohit Pappu, and Joshua Porter for manuscript advice.

Support from the National Institutes of Health is gratefully acknowledged (grant No. R01GM062154 to J.O. and P.N.B.; grant No. R43CA163403 to P.N.B.; and grant No. F32GM10664901A1 to L.L.P.).

## REFERENCES

1. Rost, B. 1999. Twilight zone of protein sequence alignments. *Protein Eng.* 12:85–94.
2. Cordes, M. H. J., and K. L. Stewart. 2012. The porous borders of the protein world. *Structure.* 20:199–200.
3. Murzin, A. G. 2008. Metamorphic proteins. *Science.* 320:1725–1726.
4. Tomar, S. K., S. H. Knauer, ..., I. Artsimovitch. 2013. Interdomain contacts control folding of transcription factor RfaH. *Nucl. Acids Res.* 41:10077–10085.
5. Alexander, P. A., Y. He, ..., P. N. Bryan. 2009. A minimal sequence code for switching protein structure and function. *Proc. Natl. Acad. Sci. USA.* 106:21149–21154.
6. Ambroggio, X. I., and B. Kuhlman. 2006. Computational design of a single amino acid sequence that can switch between two distinct protein folds. *J. Am. Chem. Soc.* 128:1154–1161.
7. Dalal, S., S. Balasubramanian, and L. Regan. 1997. Protein alchemy: changing  $\beta$ -sheet into  $\alpha$ -helix. *Nature Struct. Mol. Biol.* 4:548–552.
8. Yuan, S. M., and N. D. Clarke. 1998. A hybrid sequence approach to the paracelsus challenge. *Proteins.* 30:136–143.
9. Tuinstra, R. L., F. C. Peterson, ..., B. F. Volkman. 2008. Interconversion between two unrelated protein folds in the lymphotactin native state. *Proc. Natl. Acad. Sci. USA.* 105:5057–5062.
10. Roche, S., F. A. Rey, ..., S. Bressanelli. 2007. Structure of the prefusion form of the vesicular stomatitis virus glycoprotein G. *Science.* 315:843–848.
11. Littler, D. R., S. J. Harrop, ..., P. M. G. Curmi. 2004. The intracellular chloride ion channel CLIC1 undergoes a redox-controlled structural transition. *J. Biol. Chem.* 279:9298–9305.



12. Xu, M., A. Arulandu, ..., R. Young. 2005. Disulfide isomerization after membrane release of its SAR domain activates P1 lysozyme. *Science*. 307:113–117.
13. Tahirov, T. H., D. Temiakov, ..., S. Yokoyama. 2002. Structure of a T7 RNA polymerase elongation complex at 2.9 Å resolution. *Nature*. 420:43–50.
14. Mapelli, M., L. Massimiliano, ..., A. Musacchio. 2007. The Mad2 conformational dimer: structure and implications for the spindle assembly checkpoint. *Cell*. 131:730–743.
15. Minor, D. L., and P. S. Kim. 1996. Context-dependent secondary structure formation of a designed protein sequence. *Nature*. 380:730–734.
16. Porter, L. L., and G. D. Rose. 2012. A thermodynamic definition of protein domains. *Proc. Natl. Acad. Sci. USA*. 109:9420–9425.
17. Alexander, P., S. Fahnestock, ..., P. Bryan. 1992. Thermodynamic analysis of the folding of the streptococcal protein G IgG-binding domains B1 and B2: why small proteins tend to have high denaturation temperatures. *Biochemistry*. 31:3597–3603.
18. Wang, G., and R. L. Dunbrack. 2005. PISCES: recent improvements to a PDB sequence culling server. *Nucl. Acids Res.* 33:W94–W98.
19. Chellapa, G. D., and G. D. Rose. 2012. Reducing the dimensionality of the protein-folding search problem. *Protein Sci.* 21:1231–1240.
20. Orengo, C. A., A. D. Michie, ..., J. M. Thornton. 1997. CATH: a hierarchic classification of protein domain structures. *Structure*. 5:1093–1109.
21. Delano, W. L. 2002. The PYMOL Molecular Graphics System. Schrödinger, New York.
22. Ruan, B., K. E. Fisher, ..., P. N. Bryan. 2004. Engineering subtilisin into a fluoride-triggered processing protease useful for one-step protein purification. *Biochemistry*. 43:14539–14546.
23. Gasteiger, E., C. Hoogland, ..., A. Bairoch. 2005. Chapter 52. Protein identification and analysis tools on the EXPASY server. In *The Proteomics Protocols Handbook*. J. Walker, editor. Humana Press, Totowa, NJ, pp. 571–607.
24. Delaglio, F., S. Grzesiek, ..., A. Bax. 1995. NMRPIPE: a multidimensional spectral processing system based on UNIX pipes. *J. Biomol. NMR*. 6:277–293.
25. Goddard, T. D., and D. G. Kneller. 2004. SPARKY 3. University of California at San Francisco, San Francisco, CA.
26. Shen, Y., O. Lange, ..., A. Bax. 2008. Consistent blind protein structure generation from NMR chemical shift data. *Proc. Natl. Acad. Sci. USA*. 105:4685–4690.
27. Laskowski, R. A., J. A. Rullmann, ..., J. M. Thornton. 1996. AQUA and PROCHECK-NMR: programs for checking the quality of protein structures solved by NMR. *J. Biomol. NMR*. 8:477–486.
28. Koradi, R., M. Billeter, and K. Wüthrich. 1996. MOLMOL: a program for display and analysis of macromolecular structures. *J. Mol. Graphics*. 14:51–55.
29. Frick, I. M., M. Wikström, ..., L. Björck. 1992. Convergent evolution among immunoglobulin G-binding bacterial proteins. *Proc. Natl. Acad. Sci. USA*. 89:8532–8536.
30. He, Y., D. A. Rozak, ..., J. Orban. 2006. Structure, dynamics, and stability variation in bacterial albumin binding modules: implications for species specificity. *Biochemistry*. 45:10102–10109.
31. He, Y., Y. Chen, ..., J. Orban. 2008. NMR structures of two designed proteins with high sequence identity but different fold and function. *Proc. Natl. Acad. Sci. USA*. 105:14412–14417.
32. He, Y., Y. Chen, ..., J. Orban. 2012. Mutational tipping points for switching protein folds and functions. *Structure*. 20:283–291.
33. Alexander, P. A., Y. He, ..., P. N. Bryan. 2007. The design and characterization of two proteins with 88% sequence identity but different structure and function. *Proc. Natl. Acad. Sci. USA*. 104:11963–11968.
34. James, L. C., and D. S. Tawfik. 2003. Conformational diversity and protein evolution: a 60-year-old hypothesis revisited. *Trends Biochem. Sci.* 28:361–368.
35. Shen, Y., P. N. Bryan, ..., A. Bax. 2010. De novo structure generation using chemical shifts for proteins with high-sequence identity but different folds. *Protein Sci.* 19:349–356.
36. Gardner, K. H., X. Zhang, ..., L. E. Kay. 1998. Solution NMR studies of a 42 KDa *Escherichia coli* maltose binding protein/ $\beta$ -cyclodextrin complex: chemical shift assignments and analysis. *J. Am. Chem. Soc.* 120:11738–11748.
37. Dehouck, Y., J. M. M. Kwasigroch, ..., M. Rooman. 2011. POPMUSIC 2.1: a web server for the estimation of protein stability changes upon mutation and sequence optimality. *BMC Bioinform.* 12:151.
38. Ganesh, C., A. N. Shah, ..., R. Varadarajan. 1997. Thermodynamic characterization of the reversible, two-state unfolding of maltose binding protein, a large two-domain protein. *Biochemistry*. 36:5020–5028.
39. Best, R. B. 2014. Bootstrapping new protein folds. *Biophys. J.* 107:1040–1041.
40. Rose, G. D., P. J. Fleming, ..., A. Maritan. 2006. A backbone-based theory of protein folding. *Proc. Natl. Acad. Sci. USA*. 103:16623–16633.
41. Meyerguz, L., J. Kleinberg, and R. Elber. 2007. The network of sequence flow between protein structures. *Proc. Natl. Acad. Sci. USA*. 104:11627–11632.
42. Balbirnie, M., R. Grothe, and D. S. Eisenberg. 2001. An amyloid-forming peptide from the yeast prion Sup35 reveals a dehydrated  $\beta$ -sheet structure for amyloid. *Proc. Natl. Acad. Sci. USA*. 98:2375–2380.
43. Yadid, I., N. Kirshenbaum, ..., D. S. Tawfik. 2010. Metamorphic proteins mediate evolutionary transitions of structure. *Proc. Natl. Acad. Sci. USA*. 107:7287–7292.
44. Birzele, F., G. Csaba, and R. Zimmer. 2008. Alternative splicing and protein structure evolution. *Nucl. Acids Res.* 36:550–558.
45. Harms, M. J., and J. W. Thornton. 2010. Analyzing protein structure and function using ancestral gene reconstruction. *Curr. Opin. Struct. Biol.* 20:360–366.
46. Bridgham, J. T., E. A. Ortlund, and J. W. Thornton. 2009. An epistatic ratchet constrains the direction of glucocorticoid receptor evolution. *Nature*. 461:515–519.

Subdomain interactions foster the design of two protein pairs with ~80% sequence identity but different folds

***Supporting information***

Lauren L. Porter<sup>1,2,\*</sup>, Yanan He<sup>1</sup>, Yihong Chen<sup>1</sup>, John Orban<sup>1,3</sup>, and Philip N. Bryan<sup>1,2</sup>

<sup>1</sup>University of Maryland, Institute for Bioscience and Biotechnology Research, Rockville, MD 20850, USA <sup>2</sup>Potomac Affinity Proteins, Rockville, MD 20850, USA <sup>3</sup>University of Maryland, Department of Chemistry and Biochemistry, College Park, MD 20742, USA

\*Corresponding author: [lporter@umd.edu](mailto:lporter@umd.edu)

**Table S1A.** High-identity protein variants.

| Variant                                      | Sequence <sup>1,2</sup>                                     |
|----------------------------------------------|-------------------------------------------------------------|
| G <sub>A</sub> (PSD-1)                       | MEAVDANSLAQAKEAAIKELKQYGIGDYIYIKLINNAKTVEGVESLKNEILKALPTE   |
| <sup>54</sup> G <sub>A</sub> <sub>MBP</sub>  | NGDKDANSLAEAKEAAIKELKQYGIGEYIYIKLIENAKTVEGVESLKDEILKALPRF   |
| <sup>63</sup> G <sub>A</sub> <sub>MBP</sub>  | NGDKDANSLAEAKEKAIKELKIYGIGEHYIKLIENAKQVEAVESLKDEILKALPRF    |
| <sup>64</sup> G <sub>A</sub> <sub>MBP</sub>  | NGDKDANSLAEAKEKAIKELKIYGIGEHYIKLIENAKQVAAVESLKDEILKALPRF    |
| <sup>68</sup> G <sub>A</sub> <sub>MBP</sub>  | NGDKDANSLAEAKEKAIKDLKIYGIGEHYIKLIENAKQVAAVEDLKDEILKALPRF    |
| <sup>70</sup> G <sub>A</sub> <sub>MBP</sub>  | NGDKDANSLAEAKEKAIKDLKIYGIGEHYIKLIEKAKQVAAVEDLKDEILKALPRF    |
| <sup>75</sup> G <sub>A</sub> <sub>MBP</sub>  | NGDKGANSLAEAKEKAIKDLKIYGIGEHYIKLIEKAKQVAAVEDLKDEILKAHDF     |
| <sup>77</sup> G <sub>A</sub> <sub>MBP</sub>  | NGDKGYNSLAEAKEKAIKDLKIYGIGEHYIKLIEKAKQVAAVEDLKDEILKAHDF     |
| <sup>79</sup> G <sub>A</sub> <sub>MBP</sub>  | NGDKGYNGLAEAKEKAIKDLKIYGIGEHYIKLIEKAKQVAAVEDLKDEILKAHDF     |
| <sup>80</sup> G <sub>A</sub> <sub>MBP</sub>  | NGDKGYNGLAEAKEKAIKDLKIYGIGEHYIKLIEKAKQVAAVEDLKDILKAHDF      |
| MBP                                          | NGDKGYNGLAEVGGKFEKDTGIKVTVEHPDKLEEKFPQVAATGDPDIIFWAHDF      |
| <sup>71</sup> MBP <sub>GA</sub>              | NGDKGYNGLAEVGEKFEKDTGIKVIIVEHYIKLEEKFKQVAAVGDGPDIIFWAHDF    |
| <sup>75</sup> MBP <sub>GA</sub>              | NGDKGYNGLAEVGEKFEKDTGIKVIIVEHYIKLEEKFKQVAAVEDGPDIIFWAHDF    |
| <sup>79</sup> MBP <sub>GA</sub>              | NGDKGYNGLAEVGEKAEKDLGIKVIIVEHYIKLEEKFKQVAAVEDGPDIIFWAHDF    |
| <sup>80</sup> MBP <sub>GA</sub>              | NGDKGYNGLAEAGEKAEKDLGIKVIIVEHYIKLEEKFKQVAAVEDGPDIIFWAHDF    |
| <sup>59</sup> G <sub>A</sub> <sub>OspA</sub> | LDEKNANSLAQAKEMAIAIKELKEYGIDDYIYIKLINNAKTVEGVESLKNNILKALEGV |
| <sup>66</sup> G <sub>A</sub> <sub>OspA</sub> | LDEKNSVSLDQAKEMAIAIKELKEYGIDDYIYIKLINNAKTVEGVESLKNNILKVLGV  |
| <sup>70</sup> G <sub>A</sub> <sub>OspA</sub> | LDEKNSVSLDQAKEMAIAIKELKEYGIDDKYIKLITNAKTVEGVESLKNNILGVLEGV  |
| <sup>77</sup> G <sub>A</sub> <sub>OspA</sub> | LDEKNSVSLDQAKEMAIAIKELKEYGIDDKYILLITVAKTVLKVESLKNNILGVLEGV  |
| OspA                                         | LDEKNSVSVDLPGEMKVLVSKEKNKDGGYDLIATVDKLELKGTSKNNNGSGVLEGV    |
| <sup>68</sup> G <sub>A</sub> <sub>OspA</sub> | LDEKNSVSVDLPGEMKIKVSKEYGKDDKYILLIATVDKLELKGTSKNNNGSGVLEGV   |
| <sup>73</sup> G <sub>A</sub> <sub>OspA</sub> | LDEKNSVSVDLPGEMKIKVSKEYGKDDKYILLIATVDKTVLKGESKNNNGSGVLEGV   |
| <sup>77</sup> G <sub>A</sub> <sub>OspA</sub> | LDEKNSVSVDLPGEMAIKVSKEYGIDDKYILLIATVDKTVLKGESKNNNGSGVLEGV   |

<sup>1</sup>Colored backgrounds indicate new mutations. Font colors are changed thereafter.

<sup>2</sup>Colors correspond to classifications in Table S1B, except yellow backgrounds, which indicate residues identical to the highest-identity folded G<sub>A</sub> variant

**Table S1B.** Anticipated destabilizing effects of mutations

| Minor                                                                                                                                                                                                         | Moderate                                                                                                                                     | Significant                                                                                                                   |
|---------------------------------------------------------------------------------------------------------------------------------------------------------------------------------------------------------------|----------------------------------------------------------------------------------------------------------------------------------------------|-------------------------------------------------------------------------------------------------------------------------------|
| Irregularly structured N- and C-terminal residues with that do not form hydrophobic contacts or hydrogen bonds                                                                                                | Hydrophobic/hydrophilic surface residues ↔ other hydrophobic/hydrophilic residues (e.g. I ↔ V ↔ T, L ↔ N ↔ D, L ↔ M ↔ K, L → A, V → A, etc.) | Glycine populating disallowed regions of the alanyl Ramachandran plot → anything else                                         |
| Charged and polar surface residues whose side chains do not hydrogen bond to the backbone → residues with similar steric effects and electrostatic properties (e.g. N ↔ D, Q ↔ E, K ↔ R, D ↔ E, N ↔ Q, S ↔ T) | Helical residue → high moderate helix propensity (e.g. A → L)                                                                                | Residues with $\phi$ - $\psi$ angles outside of proline's sterically-allowed boundaries → proline                             |
| Attractive surface mutation: changing a residue that had repulsive electrostatic interactions with neighboring residues to one that no longer causes repulsive interactions                                   | Strand residue → high moderate strand propensity (e.g. V → T)                                                                                | Helical residue → residue much lower helix propensity (e.g. A → G)                                                            |
|                                                                                                                                                                                                               | Surface hydrophobic to surface hydrophilic (e.g. L → K)                                                                                      | Strand residue → residue much lower strand propensity (e.g. V → P)                                                            |
|                                                                                                                                                                                                               | Change in loop residue                                                                                                                       | Repulsive surface mutation from accumulating multiple residues with the same charge in close proximity on the protein surface |
|                                                                                                                                                                                                               |                                                                                                                                              | Any changes to hydrophobic core residues                                                                                      |
|                                                                                                                                                                                                               |                                                                                                                                              | Hydrophobic surface residue likely to cause aggregation                                                                       |

**Table S2:** Summary of structure statistics for  $^{79}\text{GA}_{\text{MBP}}$ 

---

|                                   |                 |
|-----------------------------------|-----------------|
| Experimental restraints           |                 |
| CS-Rosetta input                  |                 |
| $^{13}\text{C}^{\alpha}$ shifts   | 56              |
| $^{13}\text{C}^{\beta}$ shifts    | 51              |
| $^{13}\text{C}'$ shifts           | 55              |
| $^{15}\text{N}$ shifts            | 55              |
| $^1\text{H}^{\text{N}}$ shifts    | 55              |
| $^1\text{H}^{\alpha}$ shifts      | 52              |
|                                   |                 |
| RMSDs to the mean structure (Å)   |                 |
| Over residues 8-54                |                 |
| Backbone atoms                    | $0.54 \pm 0.16$ |
| Heavy atoms                       | $1.07 \pm 0.24$ |
| Secondary structures <sup>a</sup> |                 |
| Backbone atoms                    | $0.46 \pm 0.15$ |
| Heavy atoms                       | $0.88 \pm 0.22$ |
|                                   |                 |
| Measures of structure quality     |                 |
| Ramachandran distribution         |                 |
| Most favored regions (%)          | $98.6 \pm 1.6$  |
| Additionally allowed regions (%)  | $1.4 \pm 1.6$   |
| Generously allowed regions (%)    | $0.0 \pm 0.0$   |
| Disallowed regions (%)            | $0.0 \pm 0.0$   |
| Bad contacts/100 residues         | $0.4 \pm 0.5$   |
| Overall dihedral G factor         | $0.55 \pm 0.03$ |

---

<sup>a</sup> The secondary structure elements used were residues 8-23, 27-35 and 39-52.

**Table S3**

| Variant Name <sup>1</sup>                   | Experimentally-measured T <sub>M</sub> (°C) | Experimentally-derived $\Delta\Delta G^{2,4}$ (kcal/mol) | Predicted $\Delta\Delta G^{3,4}$ (kcal/mol) |
|---------------------------------------------|---------------------------------------------|----------------------------------------------------------|---------------------------------------------|
| <sup>63</sup> G <sub>A</sub> <sub>MBP</sub> | 80                                          | 0.29                                                     | 0.55                                        |
| <sup>64</sup> G <sub>A</sub> <sub>MBP</sub> | 76                                          | 0.23                                                     | 0.18                                        |
| <sup>68</sup> G <sub>A</sub> <sub>MBP</sub> | 62                                          | 0.86                                                     | 1.43                                        |
| <sup>70</sup> G <sub>A</sub> <sub>MBP</sub> | 63                                          | -0.06                                                    | 0.00                                        |
| <sup>79</sup> G <sub>A</sub> <sub>MBP</sub> | 55                                          | 0.50                                                     | 0.68                                        |
| <sup>80</sup> G <sub>A</sub> <sub>MBP</sub> | 53                                          | -0.06                                                    | 0.09                                        |
|                                             |                                             |                                                          |                                             |
| <sup>71</sup> MBP <sub>G<sub>A</sub></sub>  | 58                                          | 3.6                                                      | 3.17                                        |
| <sup>75</sup> MBP <sub>G<sub>A</sub></sub>  | 56                                          | 1.42                                                     | 3.41                                        |
| <sup>79</sup> MBP <sub>G<sub>A</sub></sub>  | 56                                          | 0                                                        | 3.65                                        |
| <sup>80</sup> MBP <sub>G<sub>A</sub></sub>  | 55                                          | 0.72                                                     | 3.43                                        |

<sup>1</sup>Variant names correspond to constructs in Figure 4. Mutations with disordered ends were excluded

<sup>2</sup>Determined by multiplying  $\Delta T_M$  by  $\Delta S$ .  $\Delta S$  values were determined from calorimetric measurements in [1] for G<sub>A</sub> and reference [2] for MBP.

<sup>3</sup>Values determined from PoPMuSiC 2.1 (reference 36 in the main text).

<sup>4</sup>Values in red denote a significant deviation from predicted  $\Delta\Delta G$ . We defined significant > 1 kcal/mol difference between experimental and predicted values.

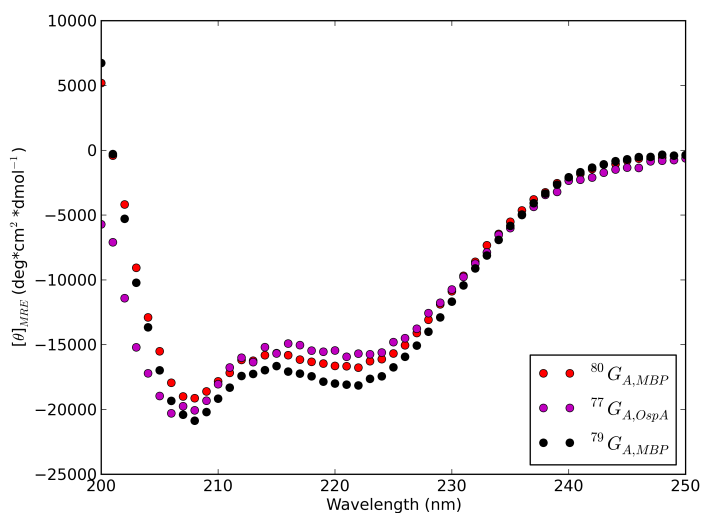

**Figure S1A.** CD Spectra of all 3  $G_A$  variants ( $^{79}G_{A,MBP}$ , black;  $^{80}G_{A,MBP}$ , red;  $^{77}G_{A,OspA}$ , purple) are consistent with one another.  $^{79}G_{A,MBP}$  is known to adopt a 3- $\alpha$ -helix bundle structure (see main text). All spectra were measured in 100 mM potassium phosphate buffer, pH 6.8.

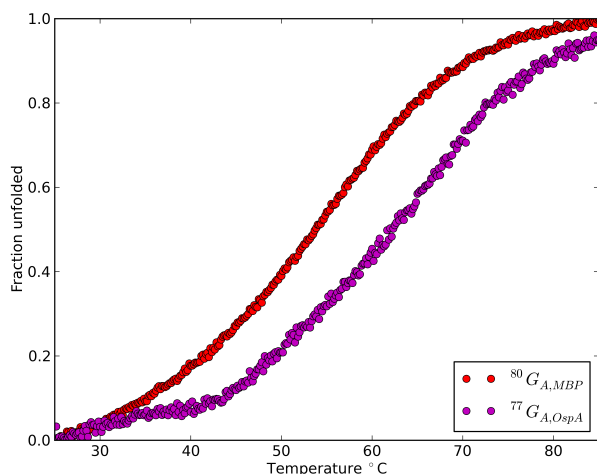

**Figure S1B.** Both  $G_A$  variants ( $^{80}G_{A,MBP}$ , red;  $^{77}G_{A,OspA}$ , purple) unfold cooperatively in response to heat. All measurements were taken in 100 mM potassium phosphate buffer, pH 6.8.

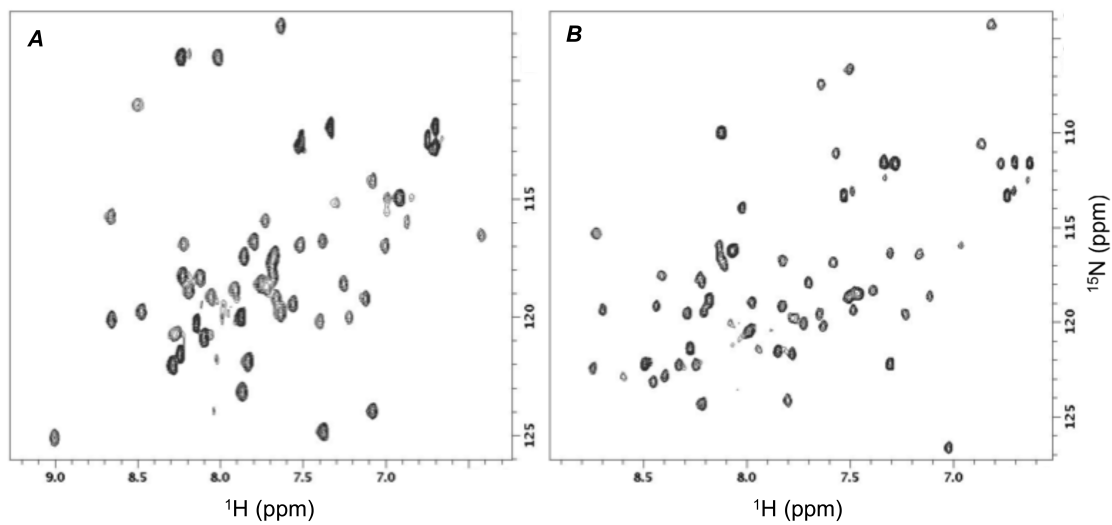

**Fig. S2:** The 2D  $^{15}\text{N}$  HSQC spectra for A)  $^{80}\text{GA}_{\text{MBP}}$  and B)  $^{77}\text{GA}_{\text{OspA}}$  indicate well-folded proteins. Both were acquired at  $10^\circ\text{C}$  in 100 mM potassium phosphate buffer, pH 7.0.



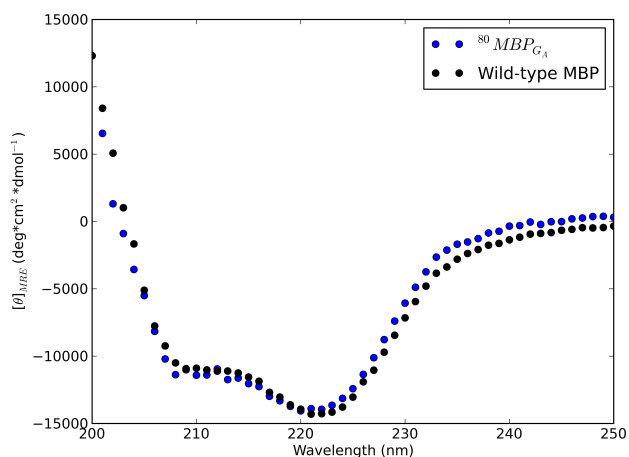

**Figure S3A.** The CD Spectrum of  $^{80}\text{MBP}_{\text{GA}}$  (blue) is consistent with that of wild-type MBP (black). Both spectra were measured in 100 mM potassium phosphate buffer, pH 6.8.

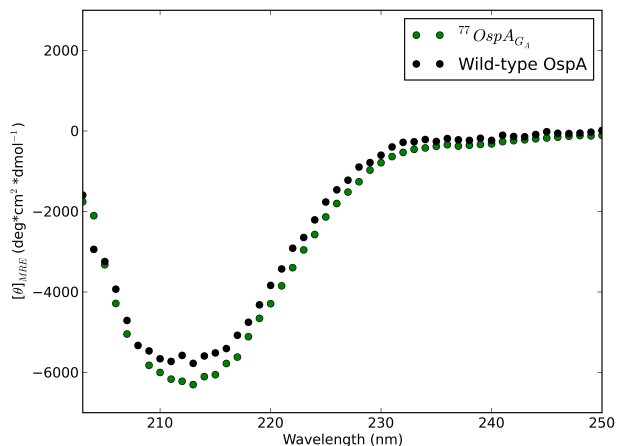

**Figure S3B.** The CD Spectrum of  $^{77}\text{OspA}_{\text{GA}}$  (green) is consistent with that of wild-type OspA (black). Both spectra were measured in 100 mM potassium phosphate buffer, pH 6.8.

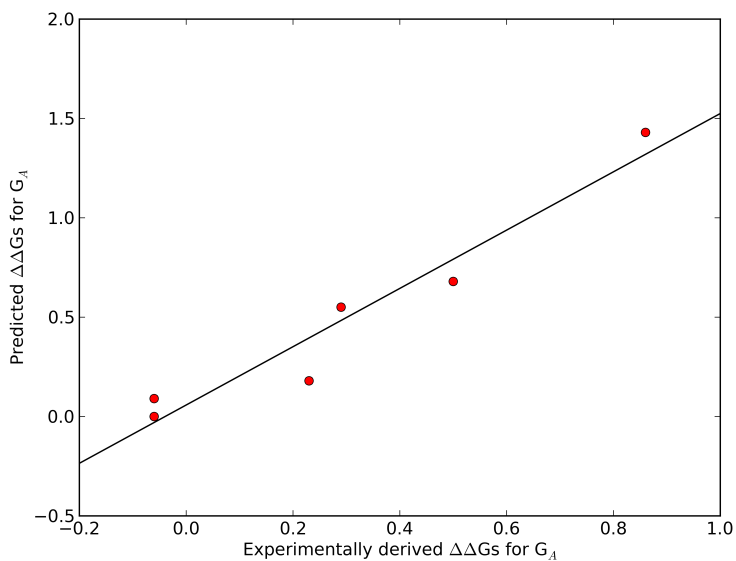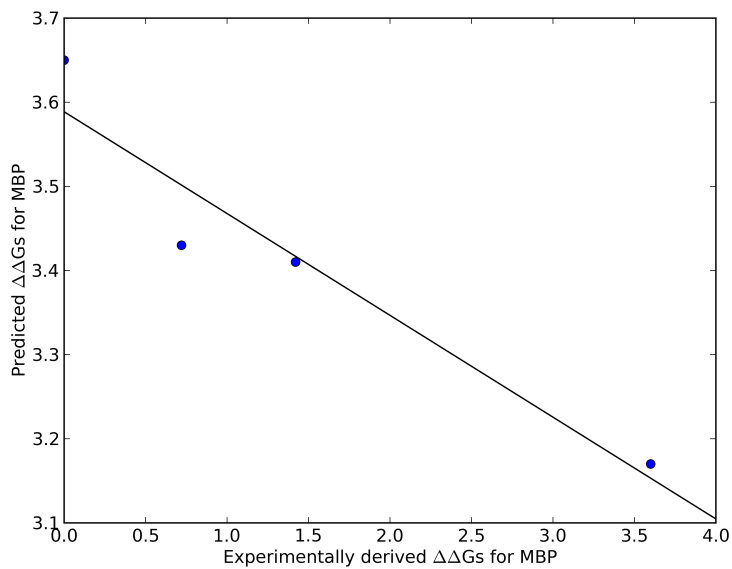

**Fig. S4:** Experimentally-measured  $\Delta\Delta G$ s correspond well to predicted values (positive correlation,  $R^2=0.94$ ) for  $G_A$  (red) but not for MBP (blue, negative correlation,  $R^2=0.98$ ). This suggests that interactions with neighboring subdomains compensated for mutations that would have likely destabilized the MBP destination fold in isolation. Lines of best fit are shown in black for both plots.

## SUPPORTING REFERENCES

[1] He, Y., Rozak, D.A., Sari, N., Chen, Y., Bryan, P.N., and J. Orban, 2006. Structure, Dynamics, and Stability Variation in Bacterial Albumin Binding Modules: Implications for Species Specificity. *Biochemistry* 45:10102-10109

[2] Ganesh, C., A.N. Shah, C.P. Swaminathan, A. Surolia, and R. Varadarajan, 1997. Thermodynamic characterization of the reversible, two-state unfolding of maltose binding protein, a large two-domain protein. *Biochemistry* 36:5020-5028.
